# Supplementary material for: Modularity and evolutionary constraints in a baculovirus gene regulatory network
Source: PubMed Central journal article supplement (PMC3879405; doi:10.1186/1752-0509-7-87), 2013-09-04
Supplement: 1752-0509-7-87-S4.pdf [file 1752-0509-7-87-S4.pdf]

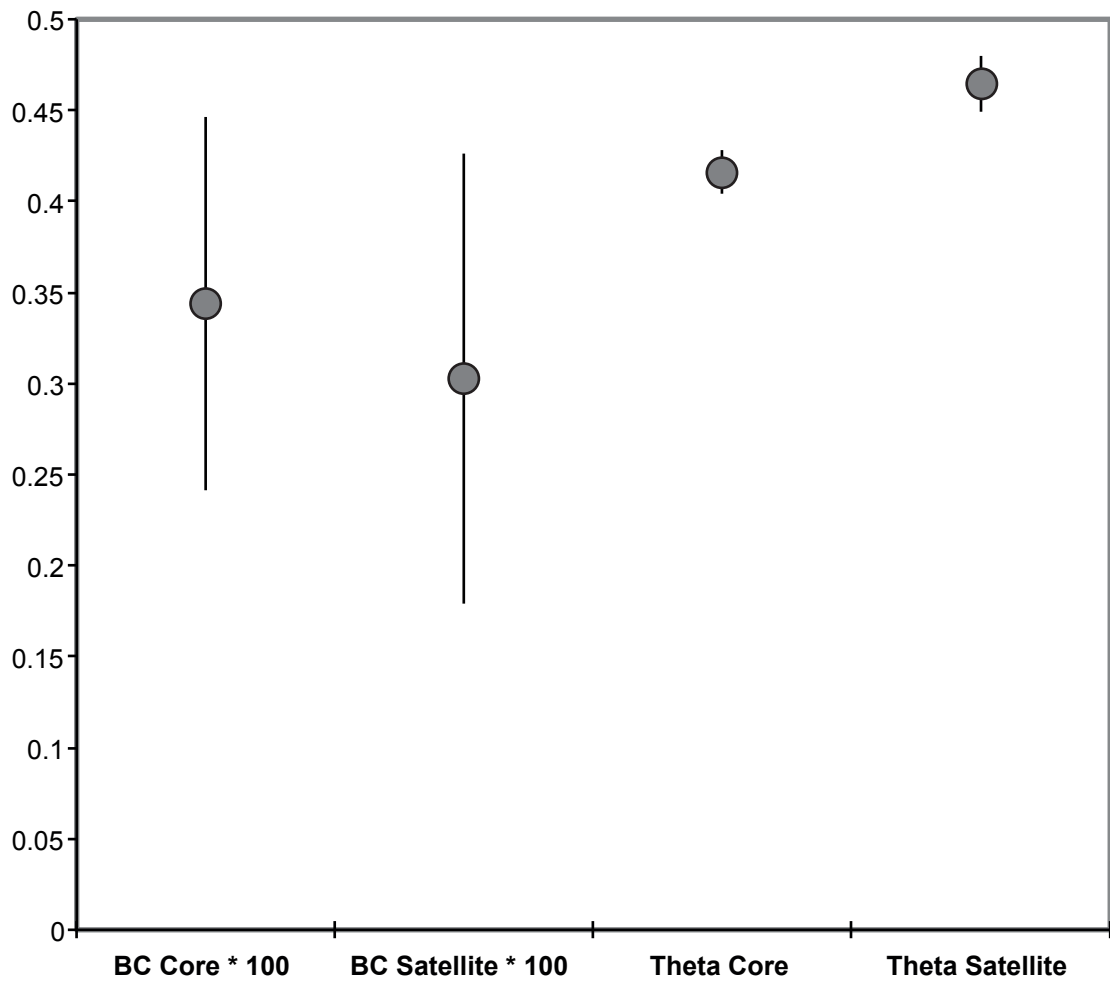

**Figure S2.** Comparison of 74 genes with capsid and replication-associated functions, compared to the 75 other genes, grouped as 'core' or 'satellite' respectively (Zanotto & Krakauer, 2008). The median values of betweenness centrality (BC) and genetic diversity ( $\theta$ ) and the associated standard errors are shown. BC values were multiplied by 100 for comparative scaling with  $\theta$ .
