# Supplementary material for: Modularity and evolutionary constraints in a baculovirus gene regulatory network
Source: PubMed Central journal article supplement (PMC3879405; doi:10.1186/1752-0509-7-87), 2013-09-04
Supplement: 1752-0509-7-87-S7.pdf [file 1752-0509-7-87-S7.pdf]

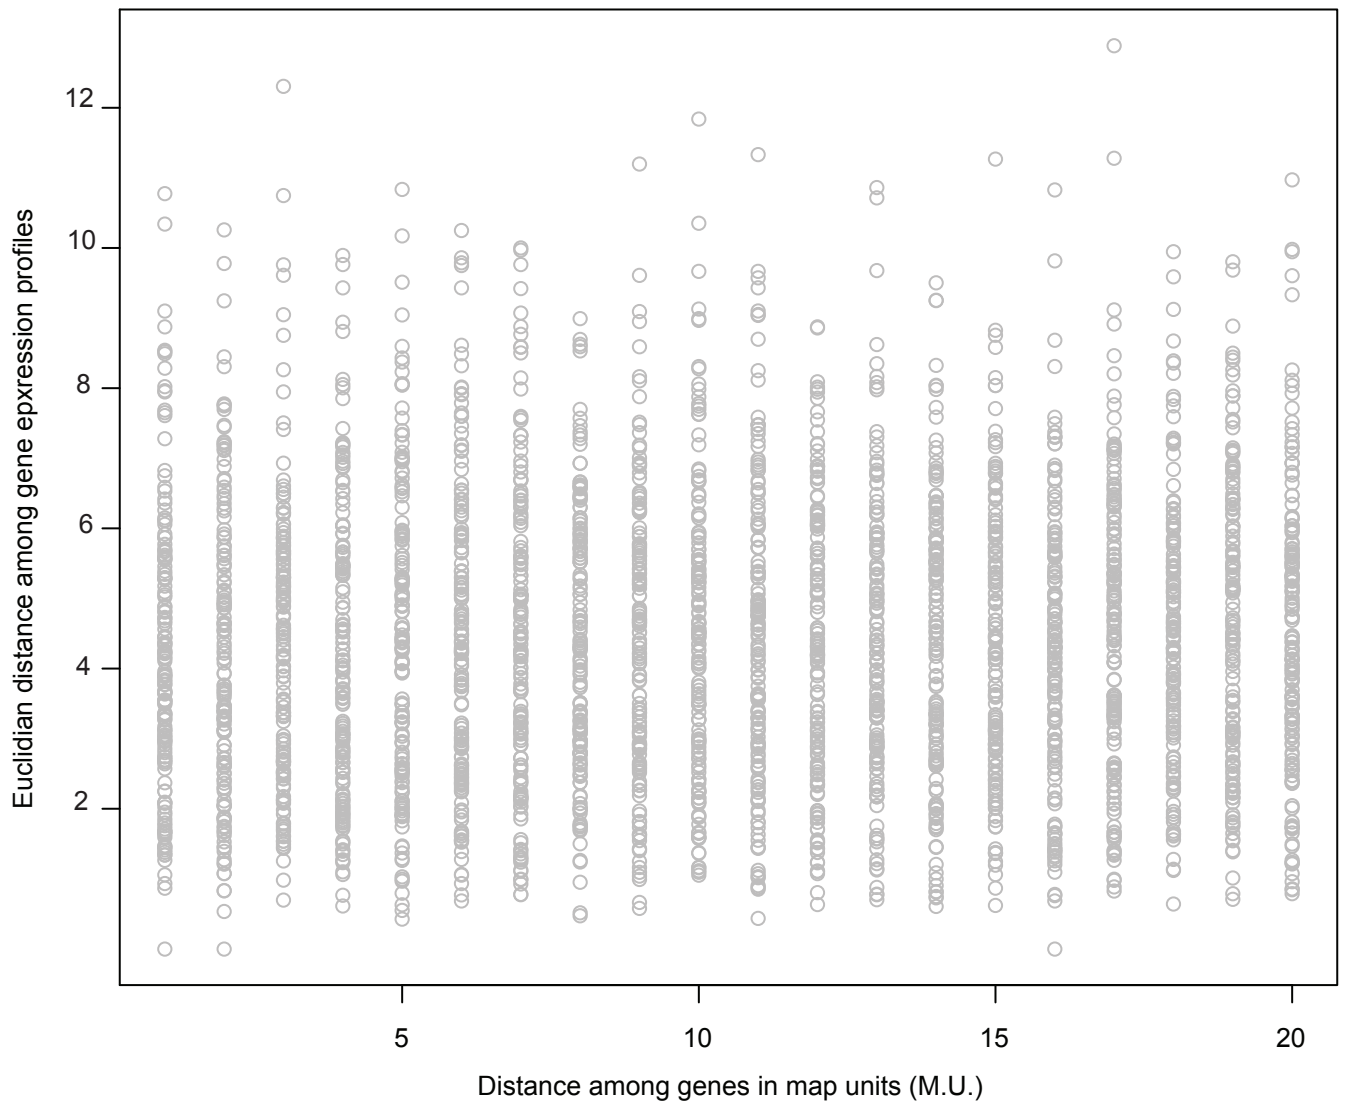

**Figure S4.** Plot of the Euclidean distances in expression profiles and physical distance among genes in the viral genome in map units. There is no significant correlation between these two variables indicating that the physical proximity of ORFs does not explain their temporal expression pattern.
